# Supplementary material for: Fabrication and application of a novel electrochemical biosensor based on a mesoporous carbon sphere@UiO-66-NH2/Lac complex enzyme for tetracycline detection
Source: Royal Society of Chemistry journal article supplement (doi:10.1039/d0an02430a), 2021-01-01
Supplement: d0an02430a2.pdf [file d0an02430a2.pdf]

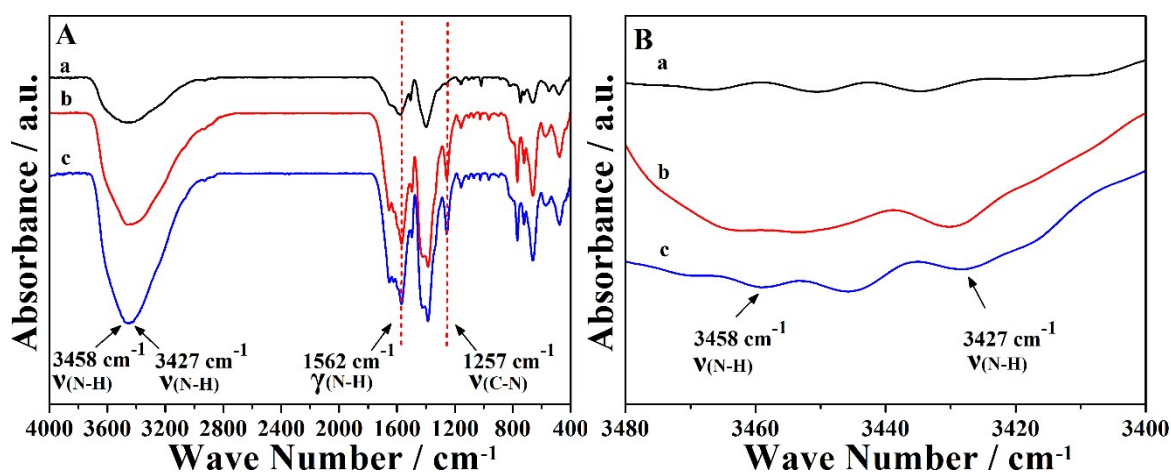

Fig. S1 (A) FT-IR spectra of the as-prepared materials: (a) UiO-66, (b) UiO-66-NH<sub>2</sub> and (c) MCS@UiO-66-NH<sub>2</sub>. (B) Partial enlarged details of (A).
