# Supplementary material for: Fabrication and application of a novel electrochemical biosensor based on a mesoporous carbon sphere@UiO-66-NH2/Lac complex enzyme for tetracycline detection
Source: Royal Society of Chemistry journal article supplement (doi:10.1039/d0an02430a), 2021-01-01
Supplement: d0an02430a3.pdf [file d0an02430a3.pdf]

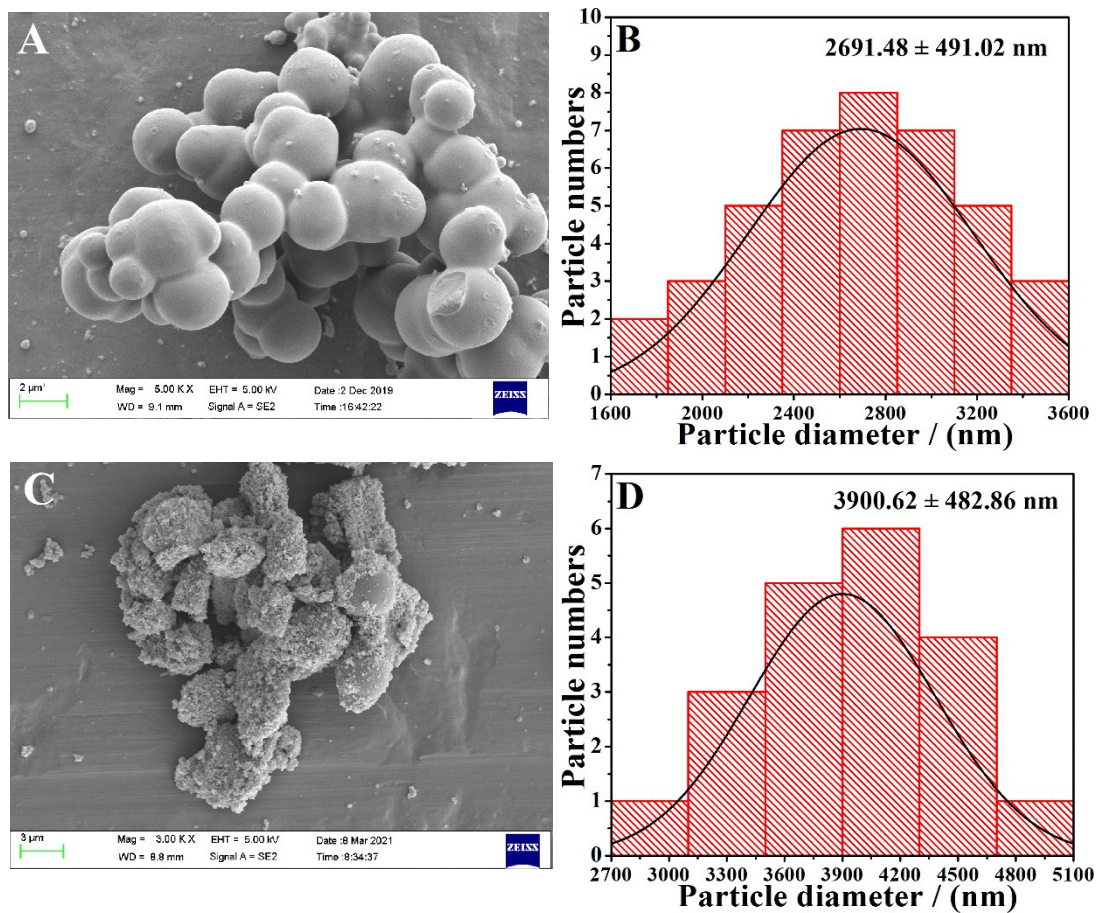

Fig. S2 (A) SEM image of MCS, (B) particle size distribution histogram obtained from SEM image (A), (C) SEM image of MCS@UiO-66-NH<sub>2</sub>, (D) particle size distribution histogram obtained from SEM image (C).
