# Supplementary material for: Fabrication and application of a novel electrochemical biosensor based on a mesoporous carbon sphere@UiO-66-NH2/Lac complex enzyme for tetracycline detection
Source: Royal Society of Chemistry journal article supplement (doi:10.1039/d0an02430a), 2021-01-01
Supplement: d0an02430a7.pdf [file d0an02430a7.pdf]

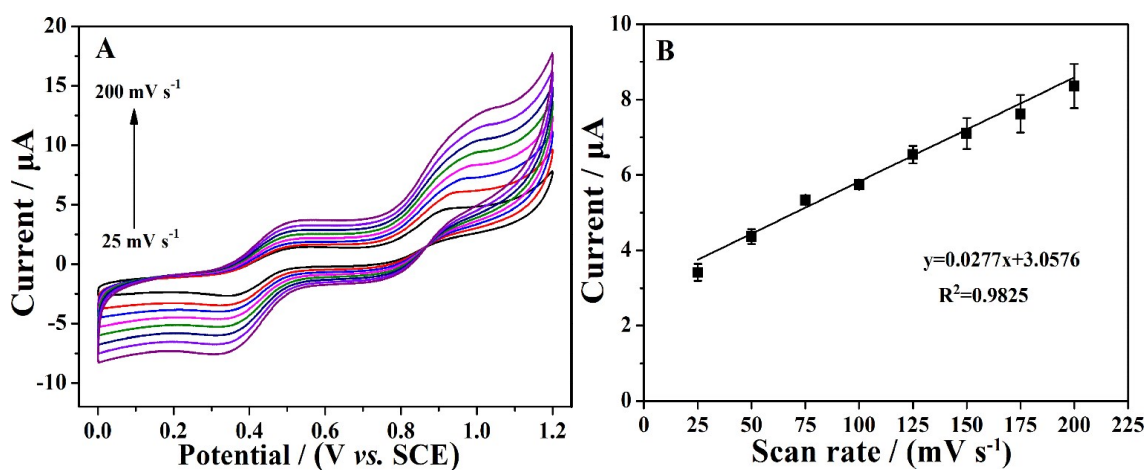

Fig. S6 (A) CVs of MCS@ UiO-66-NH<sub>2</sub>/Lac/ABTS/CHIT/GCE biosensor measured at scan rates range 25-200  $\text{mV s}^{-1}$ . (B) Plots of the peak current vs. scan rate
