# Supplementary material for: Fabrication and application of a novel electrochemical biosensor based on a mesoporous carbon sphere@UiO-66-NH2/Lac complex enzyme for tetracycline detection
Source: Royal Society of Chemistry journal article supplement (doi:10.1039/d0an02430a), 2021-01-01
Supplement: d0an02430a10.pdf [file d0an02430a10.pdf]

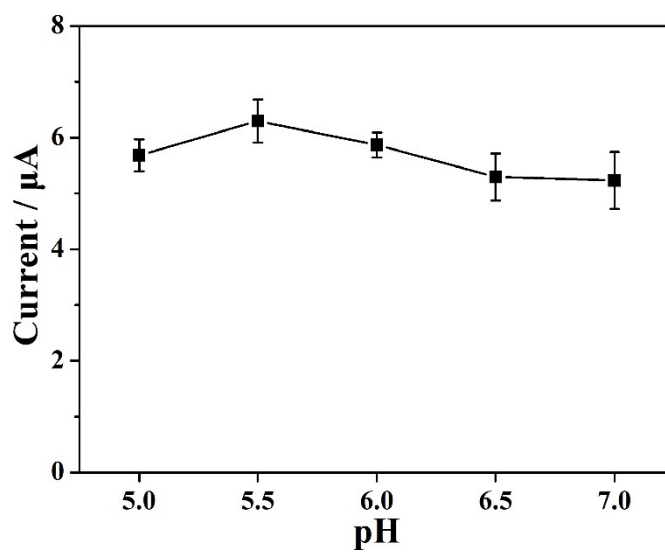

Fig. S9 Effect of the pH of HAc-NaAc buffer solution on the response current of the MCS@UiO-66-NH<sub>2</sub>/Lac/ABTS/CHIT/GCE biosensor.
