# Supplementary figures and images for: Fabrication and application of a novel electrochemical biosensor based on a mesoporous carbon sphere@UiO-66-NH2/Lac complex enzyme for tetracycline detection
Source: Royal Society of Chemistry journal article supplement (doi:10.1039/d0an02430a), 2021-01-01

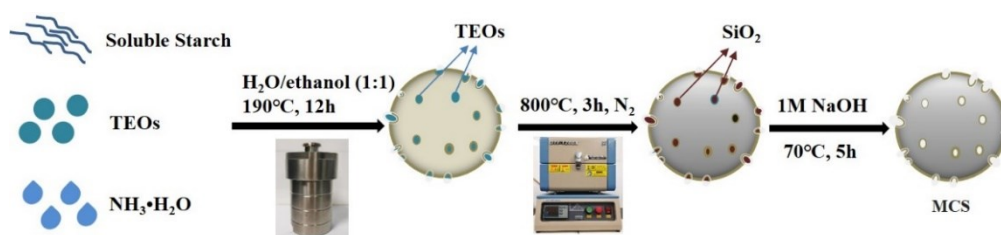

Scheme S2 Schematic illustration of the synthesis process of MCS.

Supplement: d0an02430a13.pdf [file d0an02430a13.pdf]

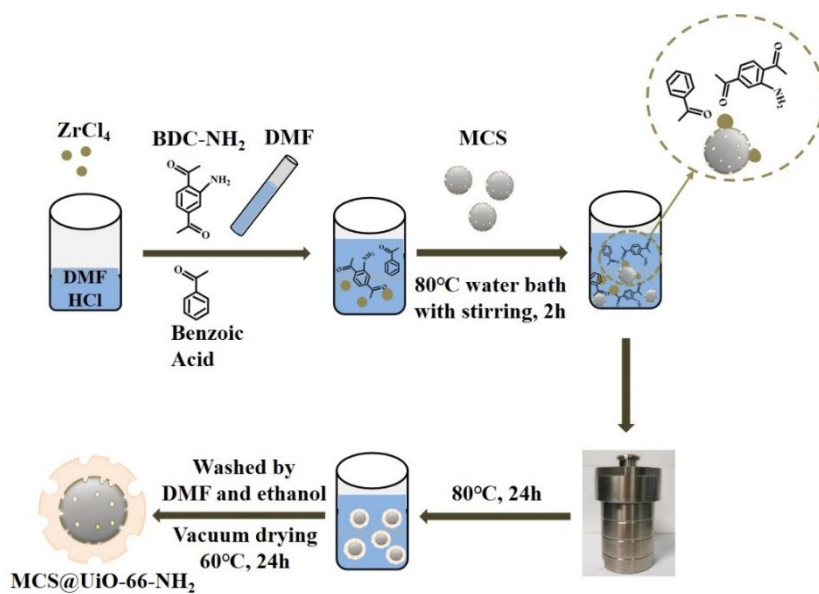

Scheme S3 Schematic illustration of the synthesis process of the MCS/Uio-66-NH<sub>2</sub> composite.

Supplement: d0an02430a14.pdf [file d0an02430a14.pdf]

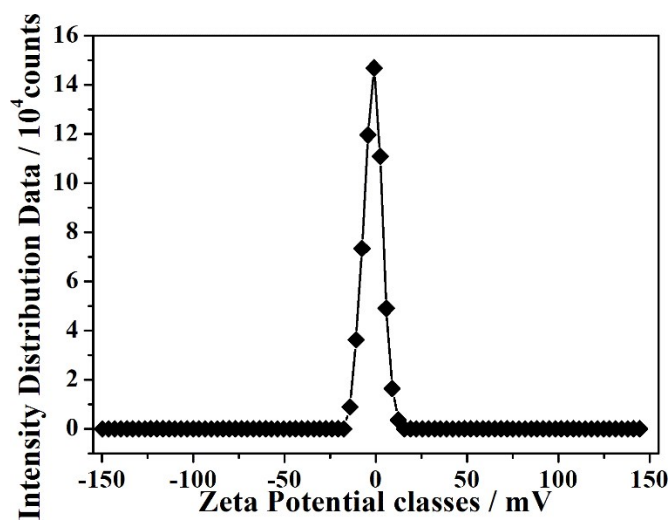

Fig. S4 Zeta-potential of MCS@UiO-66-NH<sub>2</sub> at the immobilization pH of 6.0.

Supplement: d0an02430a5.pdf [file d0an02430a5.pdf]

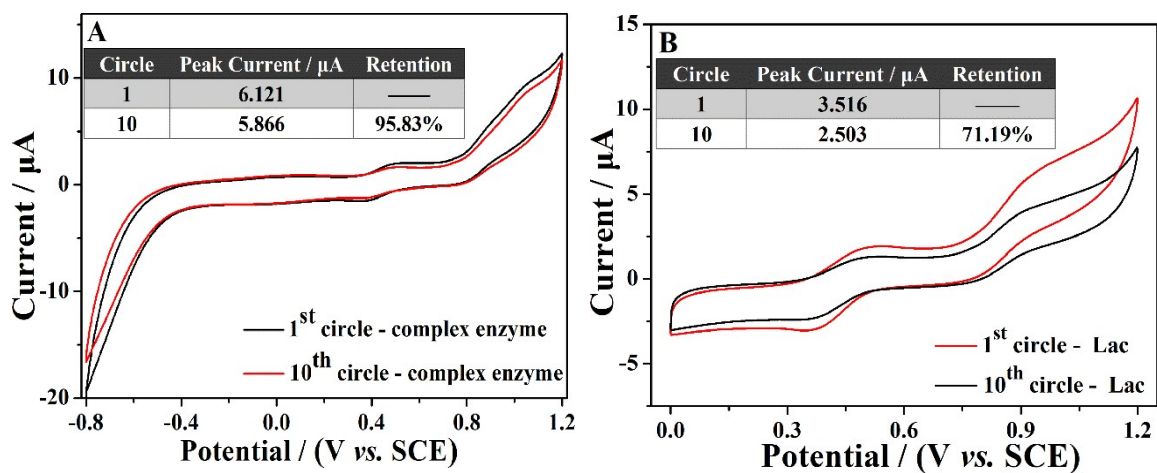

Fig. S5 Stability of as-prepared biosensors: (A) MCS/UiO-66-NH<sub>2</sub>/Lac/ABTS/CHIT/GCE, (B) Lac/ABTS/CHIT/GCE.

Supplement: d0an02430a6.pdf [file d0an02430a6.pdf]
